# Supplementary material for: Lung impedance changes during awake prone positioning in COVID-19. A non-randomized cross-over study
Source: PubMed Central journal article supplement (PMC10880988; doi:10.1371/journal.pone.0299199), 2024-02-21
Supplement: pone.0299199.s004.pdf [file pone.0299199.s004.pdf]

**Fig S4. Scatterplot of correlation between change of PaO<sub>2</sub>/FiO<sub>2</sub> ratio and change of dEELI from T1 (baseline, supine position) to T3 (60 min after prone positioning).**

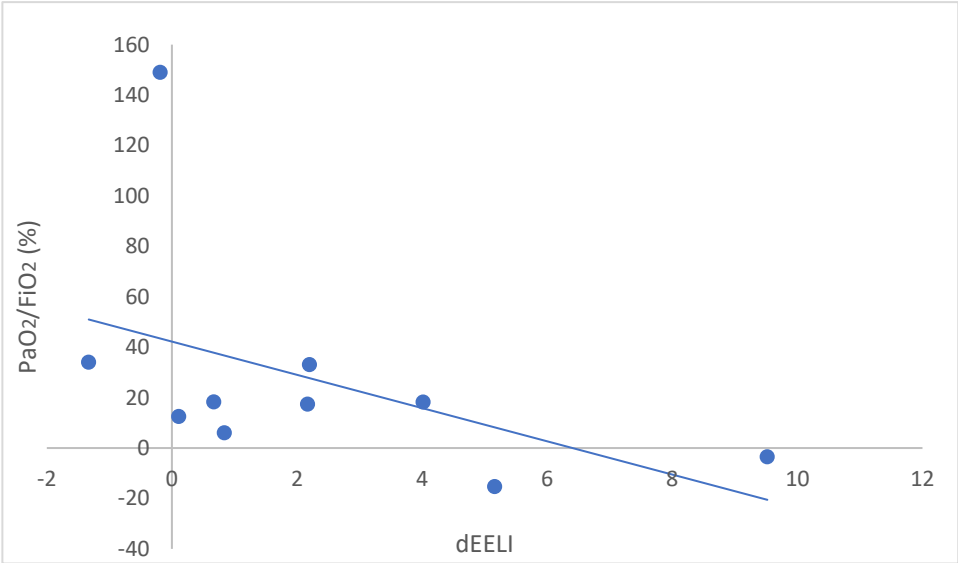

Spearman correlation analysis was used. Rho= -0.66, p=0.04 (Fig S4). dEELI, delta end-expiratory lung impedance.
